# Supplementary material for: ERICA: Emulated Retinal Image CApture - A tool for testing, training and validating retinal image processing methods
Source: bioRxiv or medRxiv preprint supplement (doi:10.1101/2021.02.22.432253), 2021-02-23
Supplement: Supplementary file [file media-2.pdf]

# ERICA: Emulated Retinal Image CApture - A tool for testing, training and validating retinal image processing methods

Laura K Young<sup>1,\*</sup> and Hannah E Smithson<sup>2</sup>

<sup>1</sup>Biosciences Institute, Newcastle University, Newcastle, NE2 4HH, UK

<sup>2</sup>Department of Experimental Psychology, University of Oxford, Oxford, OX2 6GG, UK

\*laura.k.young@newcastle.ac.uk

## Supplementary materials

Supplementary Video 1 shows a sequence of 60 synthetic frames generated using ERICA that constitute a 2 second movie. Encoded in the frames are variations in image quality due to residual aberrations not corrected by the optical system, which are modeled using a dataset of wavefront measurements captured from real eyes<sup>1</sup>. The synthetic frames have been generated with modeled movements of the eye that include drift and tremor but no microsaccades.

## References

1. Jarosz, J. *et al.* High temporal resolution aberrometry in a 50-eye population and implications for adaptive optics error budget. *Biomed. Opt. Express* **8**, 2088, DOI: [10.1364/BOE.8.002088](https://doi.org/10.1364/BOE.8.002088) (2017).
